# Supplementary material for: Reversible adsorption of iridium in lyophilized cells of the unicellular red alga Galdieria sulphuraria
Source: Royal Society of Chemistry journal article supplement (doi:10.1039/d3ra01249b), 2023-01-01
Supplement: d3ra01249b1.pdf [file d3ra01249b1.pdf]

For RSC advances,

## Supporting Information for:

# Reversible adsorption of Iridium in lyophilized cells of the unicellular red alga *Galdieria sulphuraria*

Ayumi Minoda<sup>a\*</sup>, Shuya Ueda<sup>b</sup>, Shin-ichi Miyashita<sup>c</sup>, Toshihiko Ogura<sup>d</sup>, Sachika Natori<sup>e</sup>, Jing Sun<sup>e</sup>, and Yoshio Takahashi<sup>e</sup>

<sup>a</sup>Faculty of Life and Environmental Sciences, University of Tsukuba, 1-1-1 Tennodai, Tsukuba, Ibaragi 305-8572, Japan.

<sup>b</sup>School of Life and Environmental Sciences, University of Tsukuba, 1-1-1 Tennodai, Tsukuba, Ibaragi 305-8572, Japan.

<sup>c</sup>National Metrology Institute of Japan (NMIJ), National Institute of Advanced Industrial Science and Technology (AIST), 1-1-1 Umezono, Tsukuba, Ibaraki 305-8563, Japan.

<sup>d</sup>Health and Medical Research Institute, National Institute of Advanced Industrial Science and Technology (AIST), Central 6, Higashi, Tsukuba, Ibaraki 305-8566, Japan

<sup>e</sup>Department of Earth and Planetary Science, the University of Tokyo, Hongo, Bunkyo-ku, Tokyo 113-0033, Japan.

**\*Correspondence author:** Ayumi Minoda, PhD., Faculty of Life and Environmental Sciences, University of Tsukuba, 1-1-1 Tennodai, Tsukuba, Ibaragi 305-8572, Japan.  
Tel/ Fax +81-29-853-6662; E-mail: [minoda.ayumi.gb@u.tsukuba.ac.jp](mailto:minoda.ayumi.gb@u.tsukuba.ac.jp)

## Supplementary materials method

### *Separating coefficients*

Separating coefficients were determined by the experimental results of metal recovery from polymetallic solutions using lyophilized cells, ion-exchange resin, and activated carbon (Fig. 3). Value is calculated as the ratio of the elements (Ir and another element) after separation divided by the ratio before separation.

### *Adsorption isotherm*

Ir(IV) adsorption data on lyophilized *G. sulphuraria* cells were obtained after incubating the cells in 0.2 M HCl solution containing different initial metal concentrations for 30 min at 25°C (Fig. 2). These data were analyzed using the Langmuir (Langmuir, 1918) and Freundlich (Freundlich, 1907) isotherm models.

The following Langmuir isotherm equation was used:

$$Q_e/Q_m = (1/Q_m)C_e + 1/k_L Q_m$$

where  $Q_e$  is the adsorption capacity ( $\text{mg g}^{-1}$ ),  $Q_m$  is the maximum adsorption capacity ( $\text{mg g}^{-1}$ ),  $C_e$  is the initial concentration of the precious metals in solution ( $\text{mg L}^{-1}$ ), and  $k_L$  is the Langmuir constant.

The following Freundlich isotherm equation was used:

$$\lg Q_e = \lg k_F + 1/n \lg C_e$$

where  $Q_e$  is the adsorption capacity ( $\text{mg g}^{-1}$ ),  $C_e$  is the initial concentration of the precious metals in solution ( $\text{mg L}^{-1}$ ), and  $k_F$  and  $n$  are the Freundlich constants.

Fig. S1

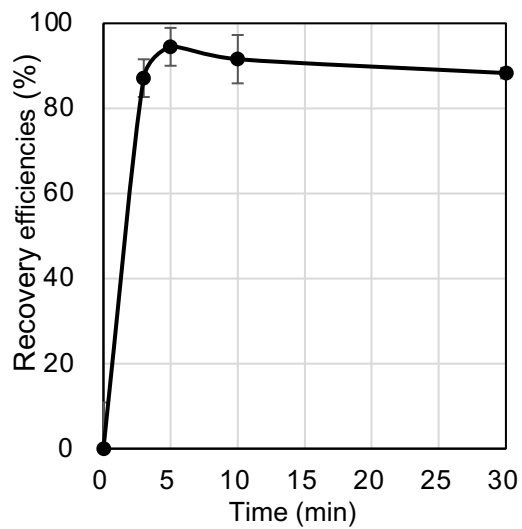

**Fig. S1** Time dependence of the efficiency of Ir recovery using lyophilized *G. sulphuraria* cells. Lyophilized cells were incubated at a loading of 20 mg mL<sup>-1</sup> for 30 min in 0.2 M HCl solution containing 10 ppm Ir.

Fig. S2

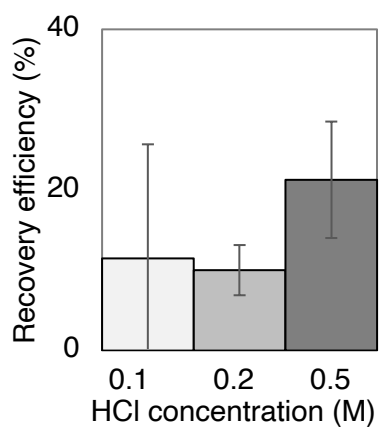

**Fig. S2 Recovery efficiencies of Rh from HCl solutions containing  $10 \text{ mg L}^{-1}$  Rh.**  $20 \text{ mg mL}^{-1}$  of lyophilized *Galdieria sulphuraria* cells was incubated for 30 min in HCl solutions containing 0.1–0.5 M HCl and  $10 \text{ mg L}^{-1}$  Rh. Values are expressed as the average  $\pm$  standard deviation of three independent experiments.

## Table S1

Table S1 Separating coefficients for Ir in lyophilized *G. sulphuraria* cells, ion-exchange resin, and activated carbon

|                                         | Ir/Rh | Ir/Zn | Ir/Cd | Ir/Mn | Ir/Fe | Ir/Cu | Ir/Ni |
|-----------------------------------------|-------|-------|-------|-------|-------|-------|-------|
| Lyophilized <i>G. sulphuraria</i> cells | 9.8   | 44    | 11    | 22    | 1.3   | 15    | 13    |
| Ion-exchange resin                      | 12    | 9.7   | 1.4   | 11    | 7.9   | 11    | 31    |
| Activated carbon                        | 2.8   | 3.5   | 2.1   | –     | –     | 2.3   | 24    |

Fig. S3

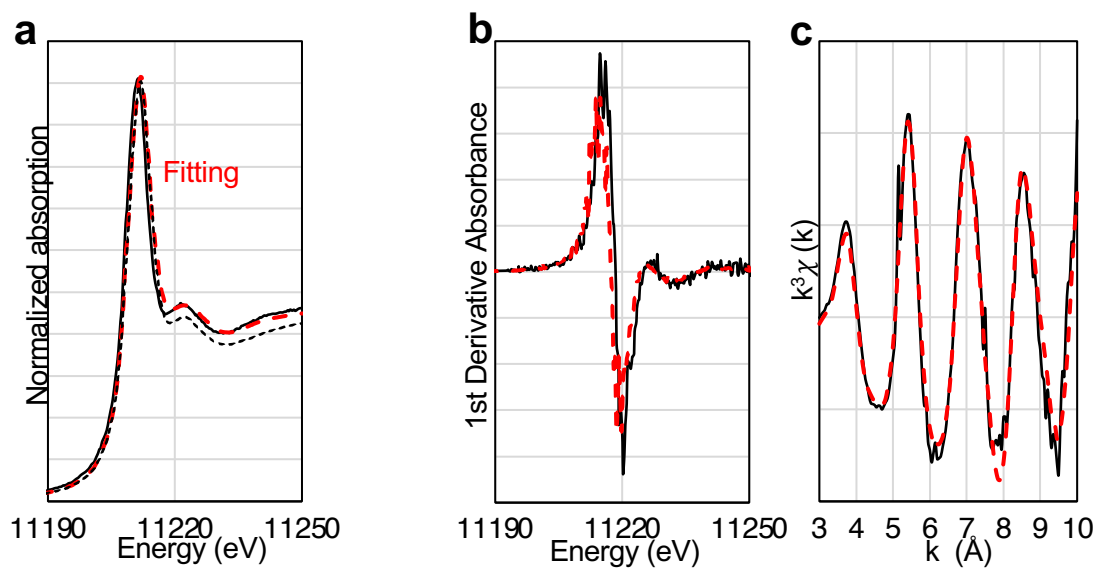

**Fig. S3 Ir-L<sub>III</sub> edge spectra and LC-XANES fits (a), the first derivatives of XANES spectra (b) and  $k^3$ -weighted  $\chi(k)$  EXAFS spectra (c) for Ir-adsorbed lyophilized *G. sulphuraria* cells incubated for 30 min.** For the linear combination (LC) fittings, 7 standards were tested for the LC fits of the Ir-adsorbed lyophilized cells. Lyophilized cells were incubated for 30 min in 0.2 M HCl solution containing 200 mg L<sup>-1</sup> Ir. The LC fitting parameters were as follows: R-factor = 0.07397, reduced  $\chi^2 = 0.02448$ .

## Table S2

Table S2 Langmuir and Freundlich isotherm constants

---

| <i>Langmuir</i> |       |
|-----------------|-------|
| Qm (mg.g)       | 98.04 |
| b (l/mg)        | 0.00  |
| R2              | 1.00  |

  

| <i>Freundlich</i> |      |
|-------------------|------|
| kF (mg/g)         | 0.28 |
| n                 | 1.46 |
| R2                | 0.99 |

---

Fig. S4

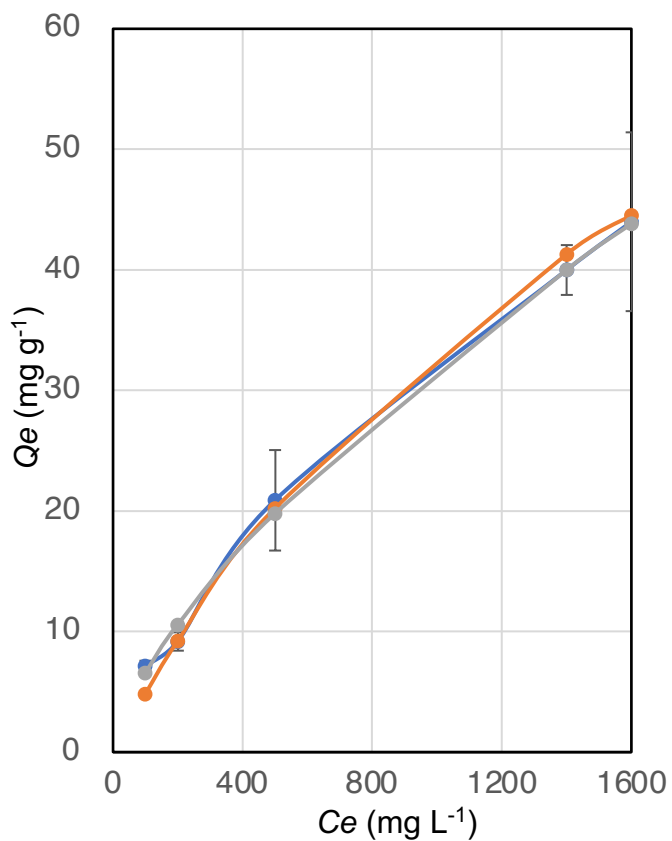

**Fig. S4 Adsorption isotherms of Ir in lyophilized *G. sulphuraria* cells.** Langmuir (orange) and Freundlich (blue) isotherms were compared with experimental data (black) for Ir in 0.2 M HCl solution.
